# Supplementary material
Source: PubMed Central journal article supplement (PMC7015846)

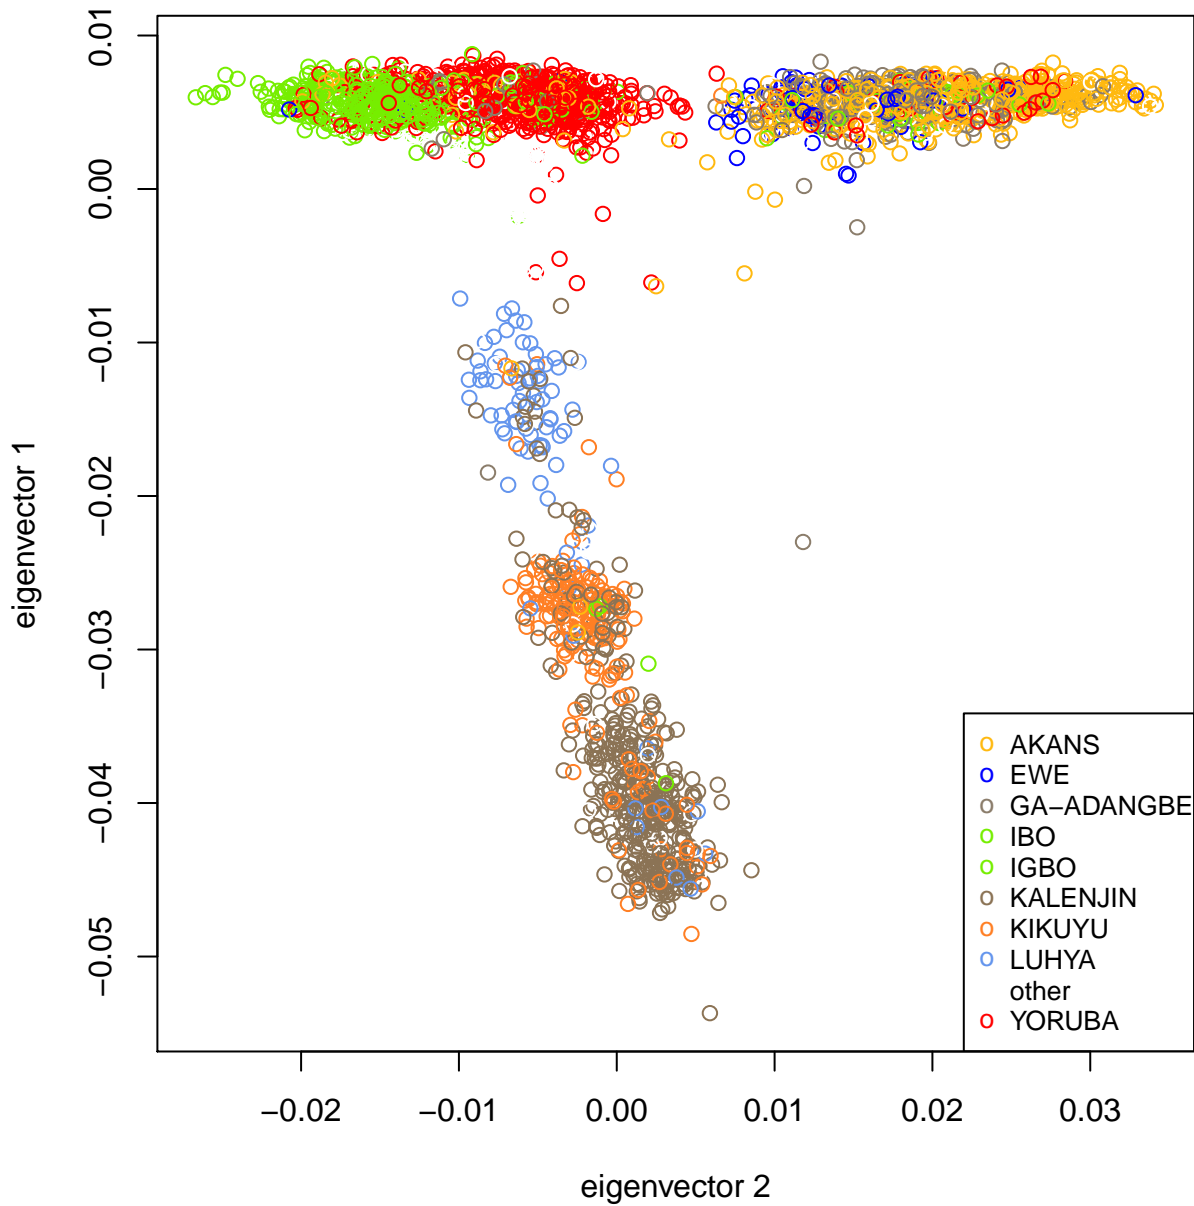

Supplement: figure_s3_aadm_pc1_pc2_ddz272.pdf [file figure_s3_aadm_pc1_pc2_ddz272.pdf]
